# Supplementary material
Source: publisher site journal article supplement (https://www.dovepress.com/get_supplementary_file.php?f=432197.docx)
Supplement: Supplementary file 1 [file get_supplementary_file.php]

**Table S1** **Interpretation criteria for MIC breakpoints**

| Antibiotics | MIC breakpoints (μg/mL) | | |
| --- | --- | --- | --- |
| S | I | R |
| ampicillin | ≤8 | 16 | ≥32 |
| ampicillin/sulbactam | ≤8/4 | 16/8 | ≥32/16 |
| cefotaxime | ≤1 | 2 | ≥4 |
| cefazolin | ≤2 | 4 | ≥8 |
| ceftazidime | ≤4 | 8 | ≥16 |
| cefoxitin | ≤8 | 16 | ≥32 |
| tetracycline | ≤4 | 8 | ≥16 |
| ciprofloxacin | ≤1 | 2 | ≥4 |
| nalidixic acid | ≤16 | - | ≥32 |
| gentamicin | ≤4 | 8 | ≥16 |
| trimethoprim/sulfamethoxazole | ≤2/38 | - | ≥4/76 |
| azithromycin | ≤2 | 16 | ≥32 |
| imipenem | ≤1 | 2 | ≥4 |
| chloramphenicol | ≤8 | 16 | ≥32 |

**Abbreviations: S, susceptible; I, intermediate; R, resistant.**
